# Supplementary material for: The cooperative role of nitrogen defects and cyano-group functionalization in carbon nitride towards enhancing its CO2photoreduction activity
Source: Royal Society of Chemistry journal article supplement (doi:10.1039/d2se01751b), 2023-01-01
Supplement: d2se01751b1.pdf [file d2se01751b1.pdf]

**Supplemental Material: Cooperative Role of Nitrogen Defects and Cyano-group Functionalization in Carbon Nitride Towards Enhancing its CO<sub>2</sub> Photoreduction Activity**

**Shreya Singh<sup>1</sup>, Pankaj Tiwari<sup>1#</sup>, Guguloth Venkanna,<sup>1#</sup> Kamal K. Pant<sup>1\*</sup>, Pratim Biswas<sup>2\*</sup>**

<sup>1</sup>Department of Chemical Engineering, Indian Institute of Technology Delhi-110016, India,  
<sup>2</sup>Aerosol and Air Quality Research Laboratory, Department of Energy, Environmental and Chemical Engineering, Washington University in St. Louis, St. Louis, MO, 63130, USA

\* [kkpant@chemical.iitd.ac.in](mailto:kkpant@chemical.iitd.ac.in)

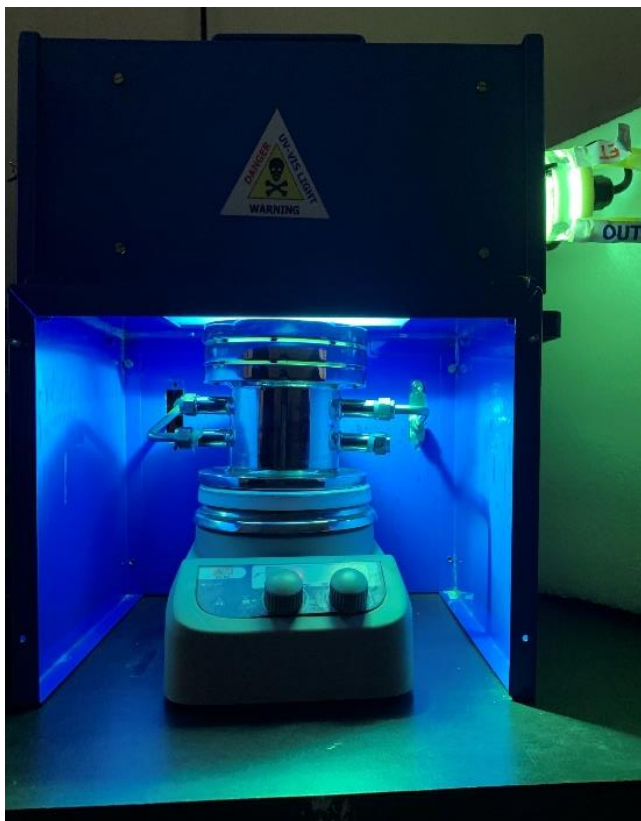

**Fig. S1:** Reactor Setup for Photocatalytic CO<sub>2</sub> reduction

Debye Scherrer equation<sup>1</sup> for the calculation of Crystalline size (D)

$$D = \left( \frac{k\lambda}{\beta \cos\theta} \right) \quad \text{Eq - S1}$$

where D is the size of the particle, K is known as the Scherer's constant (K=0.94),  $\lambda$  is the X-ray wavelength (1.54178Å),  $\beta$  is full width at half maximum (FWHM) of the diffraction peak, and  $\theta$  is the angle of diffraction

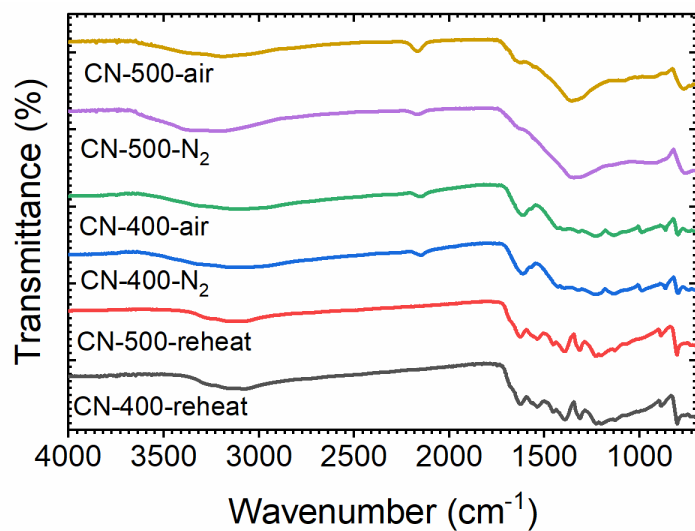

**Fig. S2:** FTIR Spectra for the controlled experiments for verification of generation of C≡N functionality due to the reductive role of NaBH<sub>4</sub> and temperature

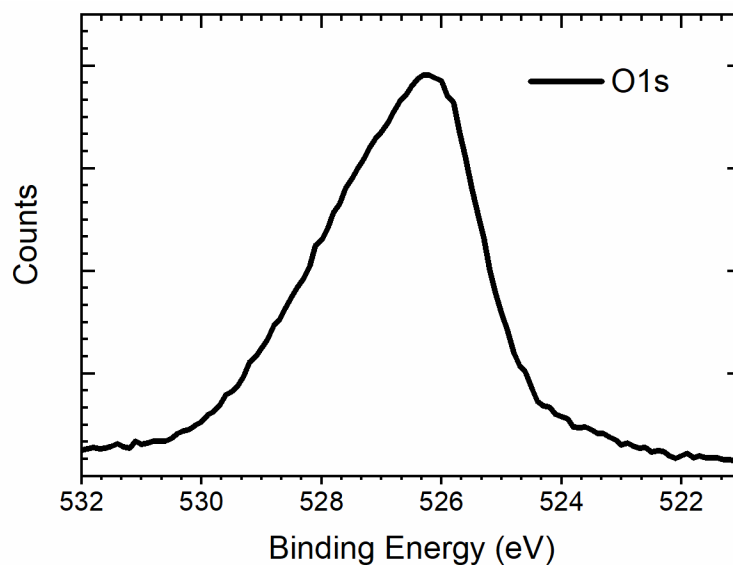

**Fig. S3:** High resolution O 1s spectra for CN-400-air sample

**Table S1:** XPS surface ratio for C/N over prepared samples.

| Sample     | N (type, corresponding area) |           | C (type, corresponding area) |          |
|------------|------------------------------|-----------|------------------------------|----------|
| CN         | 397.640                      | 16143.870 | C- C                         | 2986.049 |
|            | 398.951                      | 3443.514  | N-C=N (287.9)                | 9945.996 |
|            | 400.077                      | 2427.067  |                              |          |
| CN-400-air | 398.681                      | 12084.840 | C- C                         | 3634.971 |
|            | 400.000                      | 3755.500  | N-C=N (288.0)                | 7230.412 |
|            | 401.123                      | 3270.218  | C≡N (286.239)                | 5882.637 |

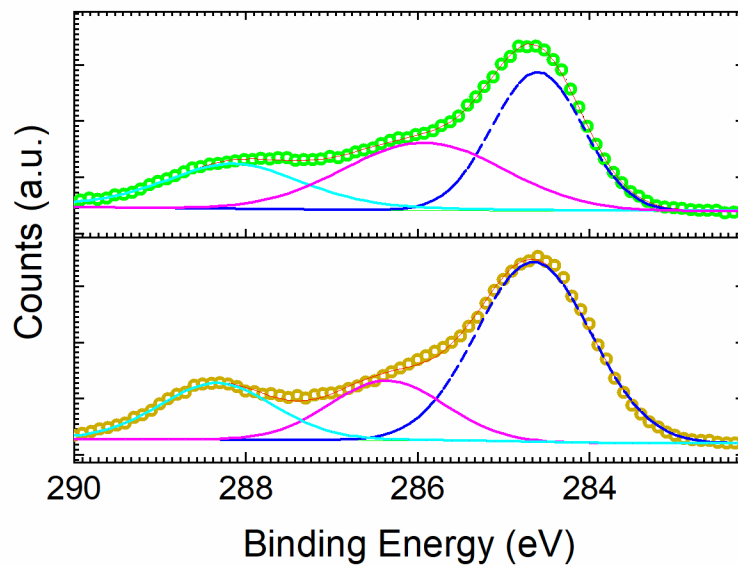

**Fig. S4:** High resolution C 1s spectra for CN-500-air, CN-500-N<sub>2</sub> sample

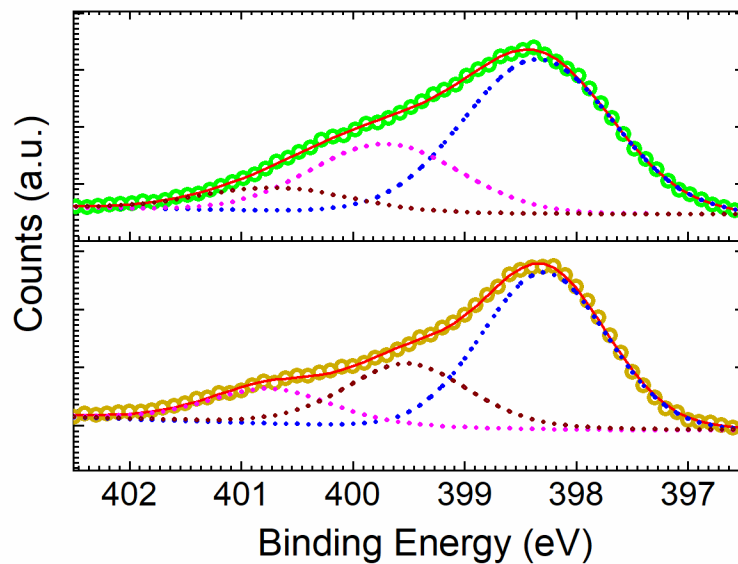

**Fig. S5:** High resolution N 1s spectra for CN-500-air, CN-500-N<sub>2</sub> sample

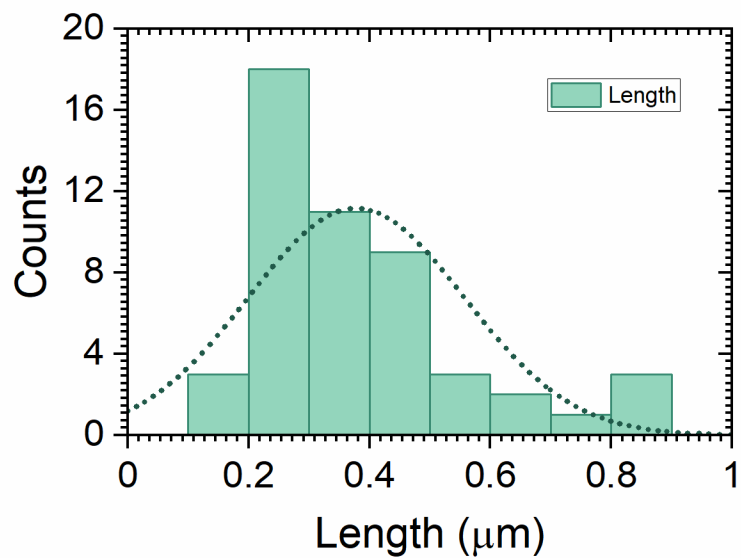

**Fig. S6:** Histogram for size distribution

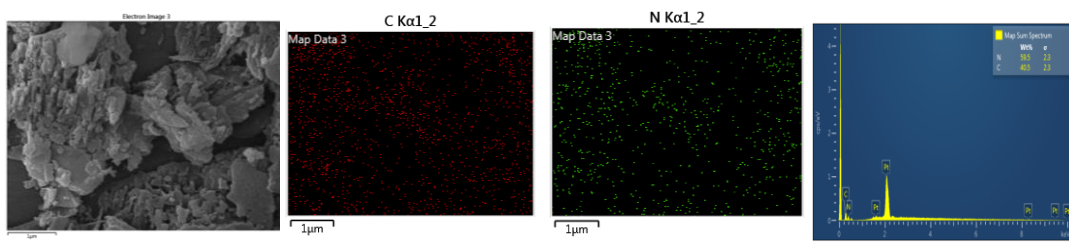

**Fig. S7:** Elemental mapping and distribution for CN-400-air

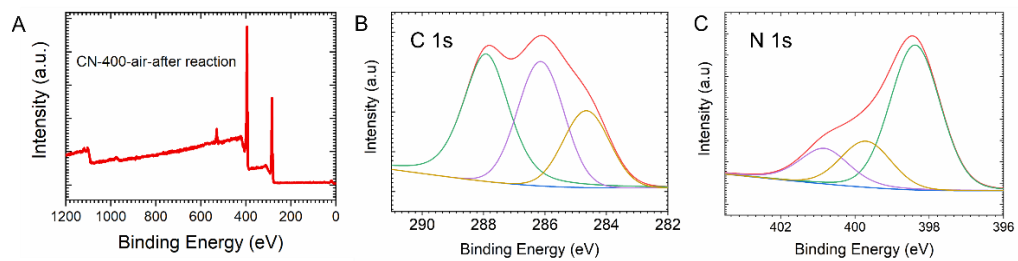

**Fig. S8:** XPS of carbon nitride sample after photoreduction reaction (A) full scan (B) C 1s (C) N 1s

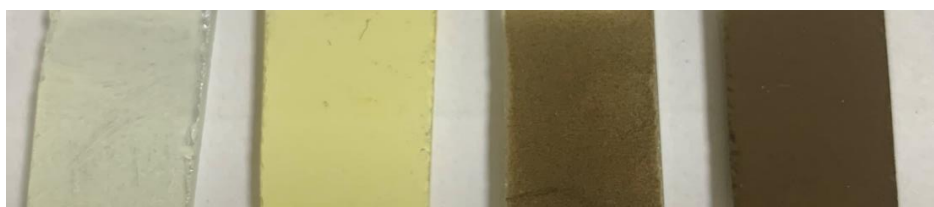

**Fig. S9:** Pristine, CN-400-air, CN-500-N<sub>2</sub> and CN-500-air samples coated over the FTO (left to right)

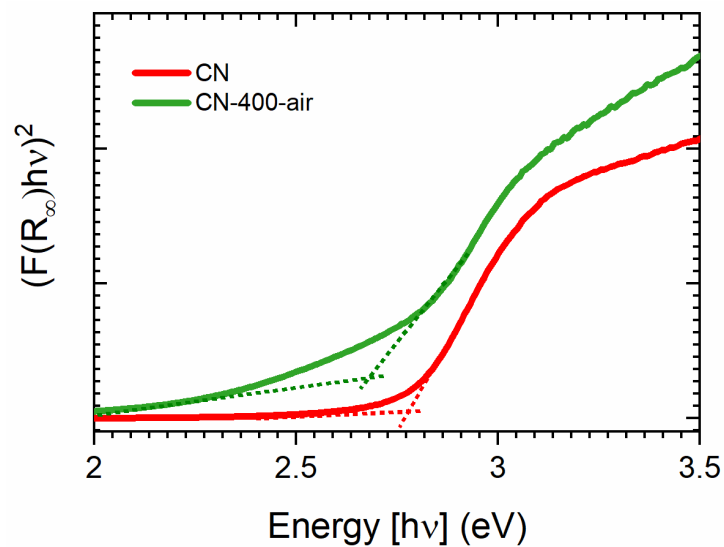

**Fig. S10:** Tauc plot for CN and CN-400-air samples

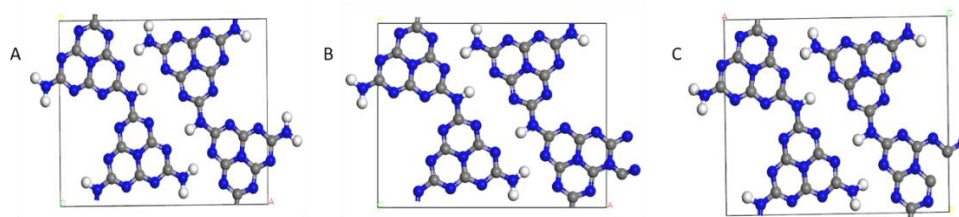

**Fig. S11:** DFT models for (A) Melon, (B) C≡N-Melon and (C) C≡N-Nv-Melon

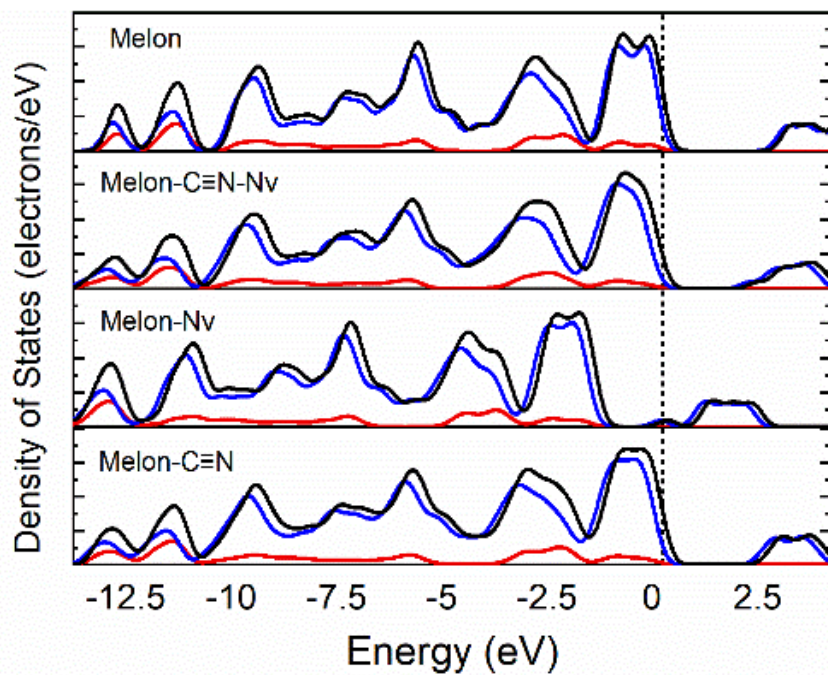

**Fig. S12:** Calculated PDOS for different models of carbon nitride s (red), p (blue) and total (black) contribution of energy

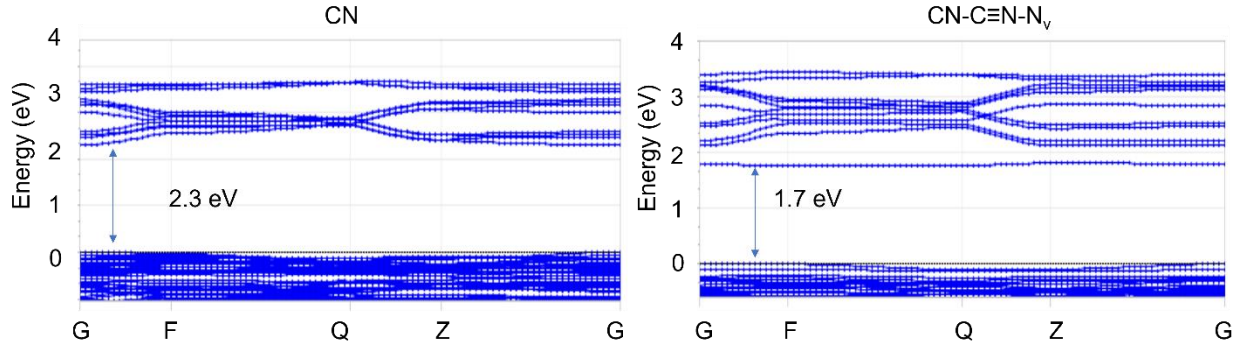

**Fig. S13:** Band structure profile for CN (left) and CN-C≡N-N<sub>v</sub> (right)

### Band edge positions determination:

The valance band positions were done through valance band XPS measurements (Fig. 5B main text). The VB-XPS provides the position of valance band maxima with reference to the fermi level. For the calculation of the fermi levels, Mott Schottky curves were utilized whose X-axis intercept provided the flat band potential w.r.t. Ag/AgCl. The fermi levels w.r.t. NHE were calculated using:

$$E_{\text{fermi, NHE}} = E_{\text{fb, Ag/AgCl}} + 0.22$$

With the calculated values of fermi levels, the valance band edge potentials were determined using VB-XPS given by:

$$E_{\text{VB, NHE}} = E_{\text{fermi, NHE}} + E_{\text{VB-XPS}}$$

The calculated bandgap values obtained from UV-DRS measurements were utilized to obtain the CB positions given by:

$$E_{\text{CB, NHE}} = E_{\text{VB, NHE}} + E_{\text{g}}$$

The calculated valance band position for CN and CN-400-air are 1.95 and 1.78 eV vs the normal hydrogen electrode (NHE), respectively and the estimated CB minima are -0.79 and -0.85 eV respectively.

**Table S2:** DFT calculated energy gaps and fermi levels for different models

| Model                 | Estimated bandgap values (eV) | Fermi level position (eV) |
|-----------------------|-------------------------------|---------------------------|
| CN                    | 2.439                         | -4.881                    |
| CN-C≡N                | 2.109                         | -5.059                    |
| CN-N <sub>v</sub>     | 0.377                         | -4.521                    |
| CN-C≡N-N <sub>v</sub> | 1.759                         | -4.503                    |

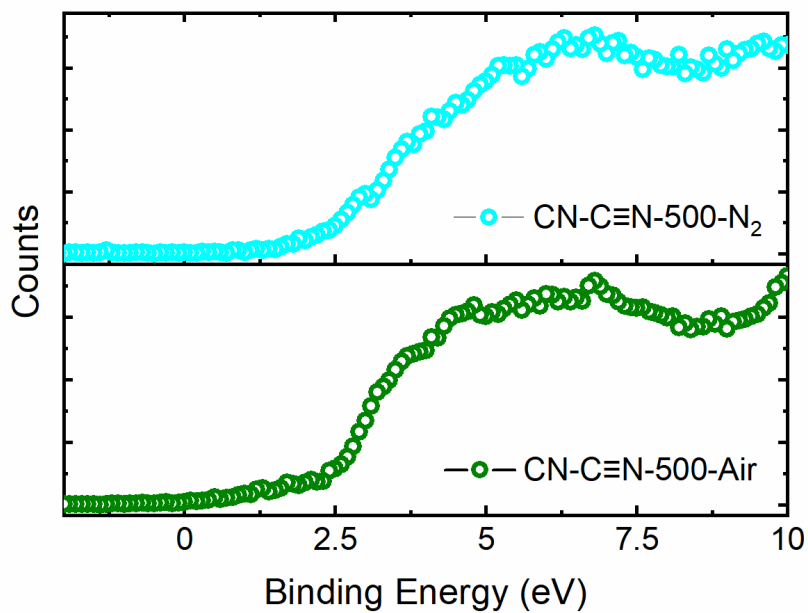

**Fig S14:** VB XPS for CN-500-env samples

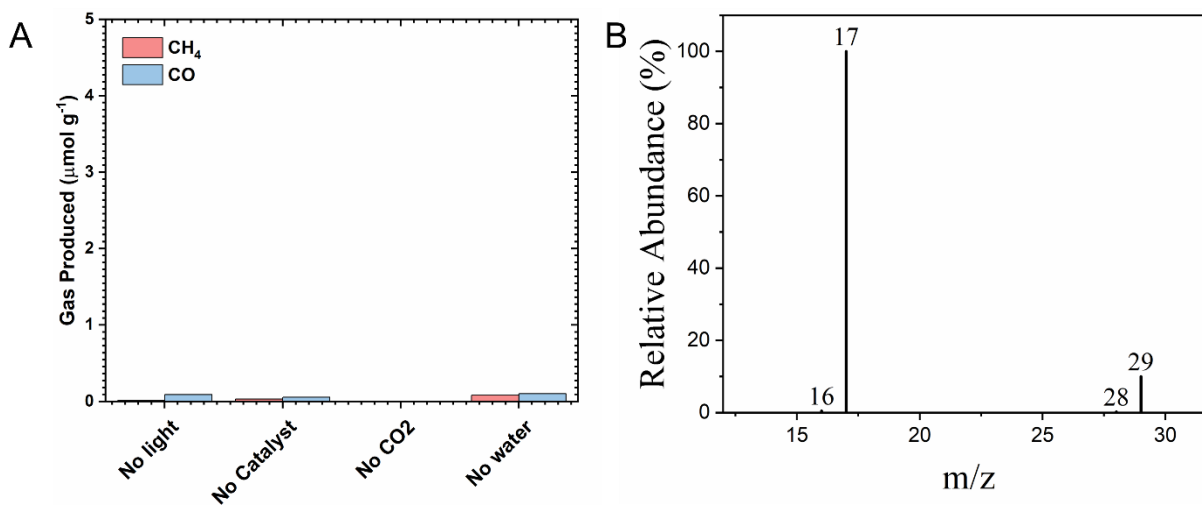

**Fig S15:** (A) Controlled experiments for confirmation of the  $\text{CO}_2$  photocatalytic reduction. Photocatalytic  $\text{CH}_4$  and  $\text{CO}$  production without light, without catalysts, without  $\text{CO}_2$  or without  $\text{H}_2\text{O}$  on CN-400-air sample (B) Mass spectrum of photocatalytic products generated during Isotopic  $^{13}\text{C}$   $\text{CO}_2$  labelled photoreduction experiment over CN-400-air

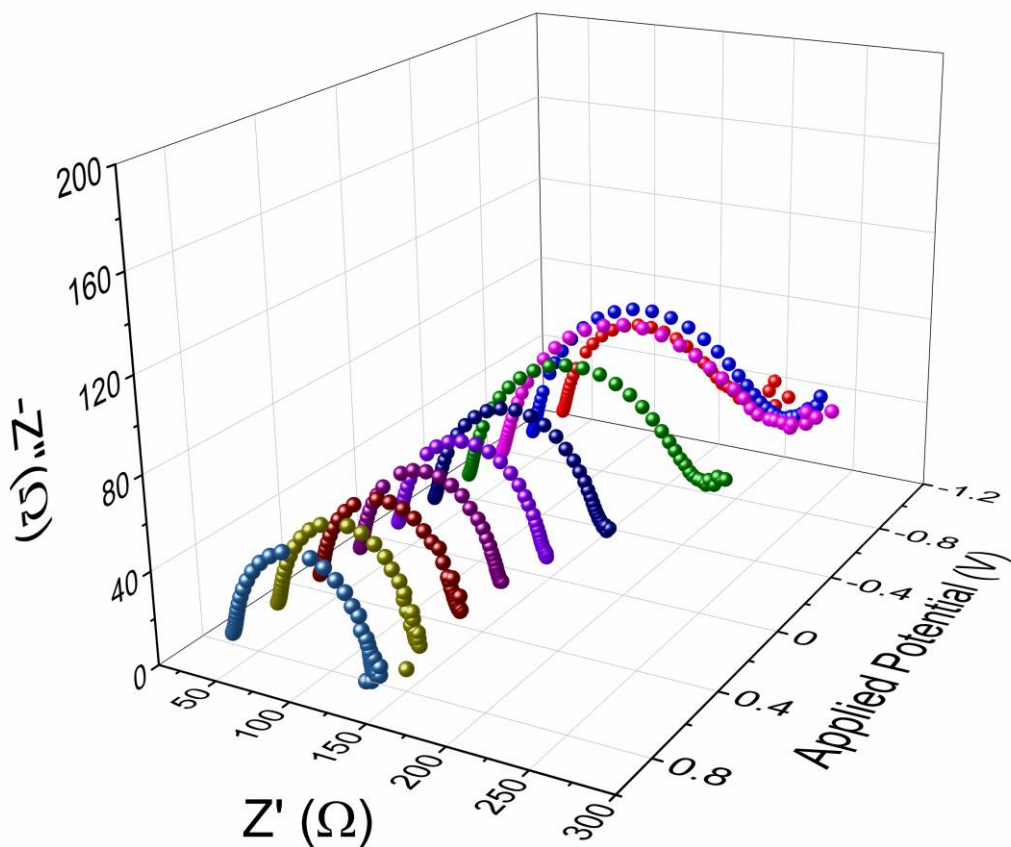

**Fig S16:** Electrochemical impedance spectra at different applied potentials

**Table S3:** Comparison of CO<sub>2</sub> reduction rates of CN-C≡N-N<sub>v</sub> with reported modified carbon nitride

| Catalyst Modification   | Reaction condition                                                                                                                               | Product yield $\mu\text{mol/g-h}$   | Reference    |
|-------------------------|--------------------------------------------------------------------------------------------------------------------------------------------------|-------------------------------------|--------------|
| CN-C≡N-N <sub>v</sub>   | 5 mg photocatalyst in 5mL H <sub>2</sub> O-TEOA mixture (10%), 1.25 kg/cm <sup>2</sup> CO <sub>2</sub> pressure, room temperature, 250 W Hg lamp | CH <sub>4</sub> 165.78<br>CO 0.9514 | this work    |
| N <sub>v</sub> -rich-CN | 0.03 g photocatalysts in 0.5mL H <sub>2</sub> O, 77 kPa, room temperature, 300W Xenon lamp                                                       | CO 6.61<br>CH <sub>4</sub> 0.2      | <sup>2</sup> |
| u-0.05PEI               | catalyst 20 mg, H <sub>2</sub> O 100 mL, 20 °C, 4 h, ultraviolet light                                                                           | CO 8.215<br>CH <sub>4</sub> 0.42    | <sup>3</sup> |
| CCN                     | 100 mg, 350 W Xe lamp, gas-phase CO <sub>2</sub> reduction                                                                                       | CO 1.07<br>CH <sub>4</sub> 1.91     | <sup>4</sup> |
| KBH-CN                  | 0.1 g photocatalysts in 0.8 mL H <sub>2</sub> O, 2bar, 300W Xenon lamp                                                                           | CO 0.63<br>CH <sub>4</sub> 1.19     | <sup>5</sup> |



|        |                                                                                  |                                 |              |
|--------|----------------------------------------------------------------------------------|---------------------------------|--------------|
| CN-525 | 50 mg, TEOA 15 vol %, 300 W xenon lamp                                           | CO 6.21                         | <sup>6</sup> |
| DCN-P  | 0.05 g photocatalyst in 100 mL H <sub>2</sub> O, room temperature, 300 W Xe lamp | CO 3.94<br>CH <sub>4</sub> 7.42 | <sup>7</sup> |

**Table S4:** Element analysis for different modified carbon nitride materials

|                       | C (wt %) | N (wt %) | H (wt %) | N/C (atomic ratio) |
|-----------------------|----------|----------|----------|--------------------|
| CN                    | 33.2     | 59.9     | 1.9      | 1.54               |
| CN-300-N <sub>2</sub> | 33.6     | 59.4     | 2.3      | 1.51               |
| CN-300-air            | 34.9     | 58.1     | 2.1      | 1.43               |
| CN-400-N <sub>2</sub> | 34.4     | 58.5     | 2.1      | 1.46               |
| CN-400-air            | 37.8     | 54.8     | 2.6      | 1.24               |
| CN-400-reheat         | 33.7     | 59.5     | 2.0      | 1.51               |

## References:

- 1 B. Ingham and M. F. Toney, *Metallic Films for Electronic, Optical and Magnetic Applications: Structure, Processing and Properties*, 2014, 3–38.
- 2 F. Li, X. Yue, D. Zhang, J. Fan and Q. Xiang, *Appl Catal B*, , DOI:10.1016/j.apcatb.2021.120179.
- 3 X. Song, X. Zhang, X. Li, H. Che, P. Huo, C. Ma, Y. Yan and G. Yang, *J Colloid Interface Sci*, 2020, **578**, 574–583.
- 4 P. Xia, M. Antonietti, B. Zhu, T. Heil, J. Yu, S. Cao, P. F. Xia, B. C. Zhu, J. G. Yu, S. W. Cao, M. Antonietti and T. Heil, *Adv Funct Mater*, 2019, **29**, 1900093.
- 5 K. Wang, J. Fu and Y. Zheng, *Appl Catal B*, 2019, **254**, 270–282.
- 6 W. Tu, Y. Xu, J. Wang, B. Zhang, T. Zhou, S. Yin, S. Wu, C. Li, Y. Huang, Y. Zhou, Z. Zou, J. Robertson, M. Kraft and R. Xu, *ACS Sustain Chem Eng*, 2017, **5**, 7260–7268.
- 7 W. Ma, N. Wang, Y. Guo, L. Yang, M. Lv, X. Tang and S. Li, *Chemical Engineering Journal*, 2020, **388**, 124288.
